# Supplementary material
Source: PubMed Central journal article supplement (PMC3578136)
Supplement: NIHMS432543-supplement-1.pdf [file NIHMS432543-supplement-1.pdf]

## Supplementary Materials

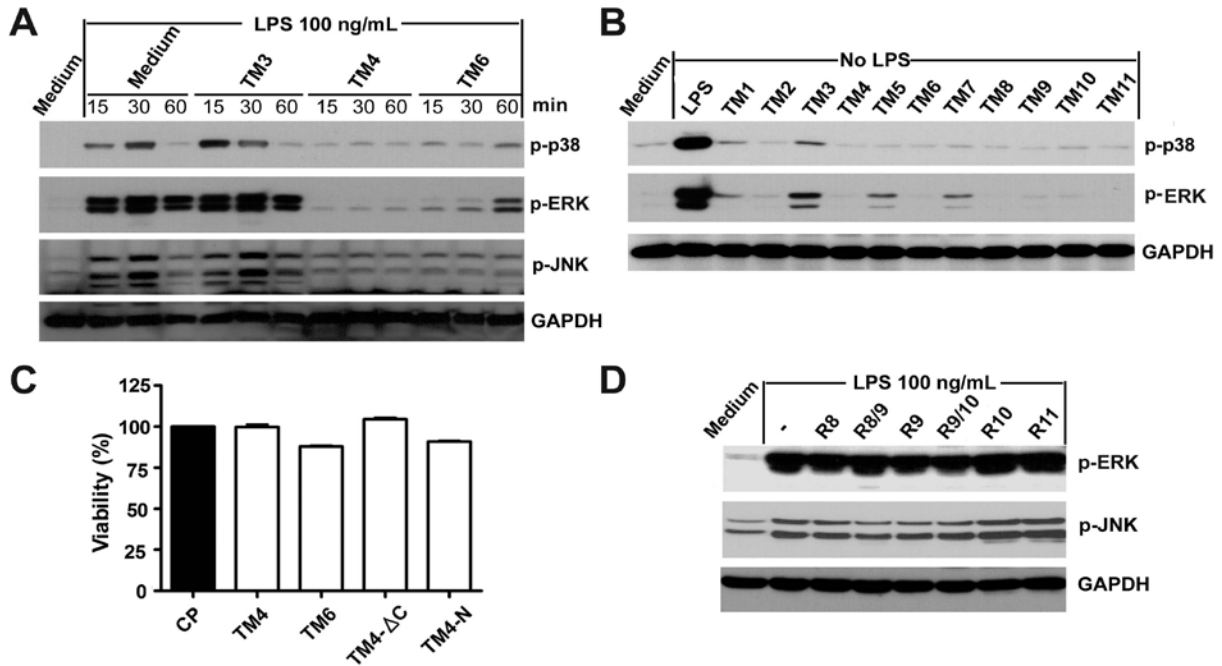

**Supplemental Figure S1.** (A) TM4 and TM6 inhibit LPS-induced MAPK activation for at least 1 hour. Mouse macrophages were pre-incubated with peptides (20  $\mu$ M) for 30 min before stimulation with LPS (100 ng/ml) for indicated time. (B) **Effect of TRAM peptides on p38 and ERK phosphorylation.** Mouse macrophages were incubated with a peptide (20  $\mu$ M) or LPS (100 ng/ml) for 30 min before cell lysis. (C) **Effect of select TRAM peptides on cell viability.** Viability of mouse peritoneal macrophages was determined using MTT incorporation assay. (D) **TM8/9 and TM9/10 peptides do not inhibit LPS-induced ERK and JNK activation.** Mouse peritoneal macrophages were pre-incubated with peptides (20  $\mu$ M) for 30 min and stimulated with LPS (100 ng/ml) for another 30 min. Data shown are representative of 2 independent experiments.

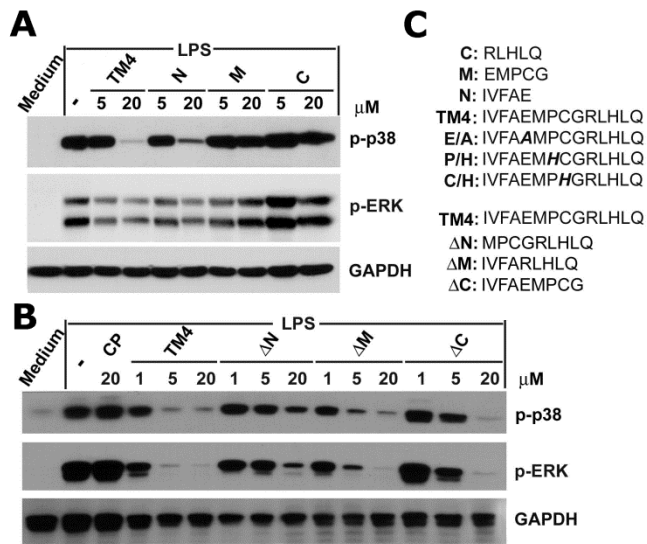

**Supplemental Figure S2.** Dose-dependence of TLR4 inhibition by TM4 variants. The experimental details are as in Figure 1. Blot shown is a representative of 3 independent experiments (**A**, **B**). The amino acid sequences of TM4 variants are also shown (**C**).

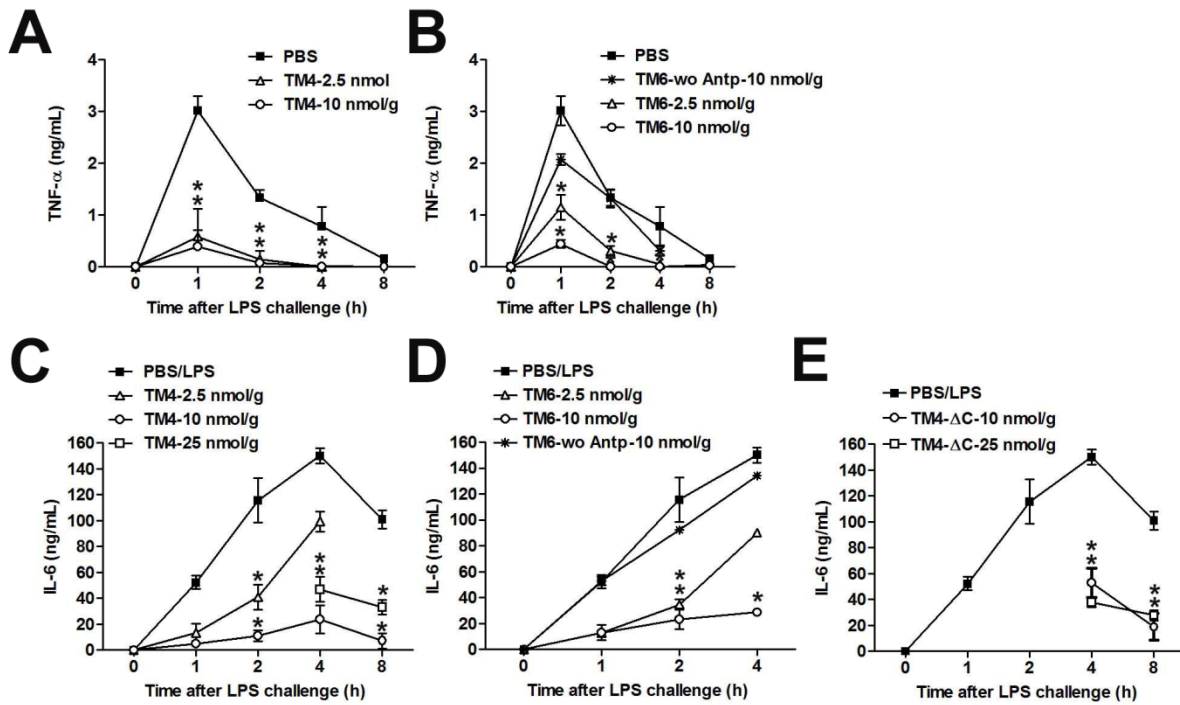

**Supplemental Figure S3.** Inhibitory peptides suppress the LPS-elicited *in vivo* inflammatory response in a dose-dependent manner. C57BL/6J mice were injected i.p. with 2.5, 10, or 25 nmol/g of animal weight of the indicated peptide 1 h before injection of LPS (1  $\mu$ g/g). Control mice received PBS only. Blood samples were collected at 0, 1, 2, 4, and 8 h after LPS challenge and TNF- $\alpha$  (A, B) and IL-6 (C-E) were measured by ELISA. TM6 peptide without the cell-permeating sequence (TM6 w/o Antp) was used as a control peptide in this series of experiments. Data represent the means  $\pm$  s.e.m. of samples collected in at least 3 independent experiments. One and two asterisks marks data that are statistically different from the control group with  $p < 0.05$  and  $p < 0.01$ , respectively (A-E).
